# Supplementary material for: A pH-sensitive and sustained-release oral drug delivery system: the synthesis, characterization, adsorption and release of the xanthan gum-graft-poly(acrylic acid)/GO–DCFP composite hydrogel
Source: Royal Society of Chemistry journal article supplement (doi:10.1039/d1ra01012c), 2021-01-01
Supplement: d1ra01012c1.pdf [file d1ra01012c1.pdf]

The study was supported by the Natural Science Foundation of Liaoning province (20180510016, 2019-MS-153) and Liaoning Revitalization Talents Program(XLYC2007054).
